# Supplementary material
Source: PubMed Central journal article supplement (PMC6469501)
Supplement: NIHMS1019039-supplement-1.pdf [file NIHMS1019039-supplement-1.pdf]

## Supplementary Material

### Supplementary Methods

From the stored serum samples, we measured inflammatory markers including high-sensitivity c-reactive protein (hs-CRP), IL-6, tumor necrosis factor- $\alpha$  (TNF- $\alpha$ ), and interferon- $\gamma$  (INF- $\gamma$ ). Serum hs-CRP was measured using a UniCel DxC system from Beckman. The inter-assay CV for this assay is 4.9%. Serum IL-6, TNF- $\alpha$  and INF- $\gamma$  were measured using the luminex platform using Millipore's reagents. The inter-assay CVs is 18.9%, 18.9% and 19.7% for each analyte.

*25(OH)D*: Total 25(OH)D (sum of 25(OH)D<sub>2</sub> and 25(OH)D<sub>3</sub>) was measured using immunoaffinity purification and liquid chromatography-tandem mass spectrometry. Calibration was confirmed with National Institute of Standards and Technology's standard reference material 972. [1] The lower limit of detection is 1.6 ng/mL and 2.0 ng/mL for 25(OH)D<sub>2</sub> and 25(OH)D<sub>3</sub>, respectively. The between-assay imprecision (%CV) is 10.3% for 25(OH)D<sub>2</sub> and 6.0% for 25(OH)D<sub>3</sub>.

*1,25(OH)<sub>2</sub>D*: Serum 1,25(OH)<sub>2</sub>D levels were also measured using high-performance liquid chromatography–tandem mass spectrometry following immunoaffinity purification of the samples. 1,25(OH)<sub>2</sub>D<sub>2</sub> and 1,25(OH)<sub>2</sub>D<sub>3</sub> levels were reported separately and total 1,25(OH)<sub>2</sub>D calculated from these values. Limits of detection with this method are 5.6 pg/mL and 6.8 pg/mL for 1,25(OH)<sub>2</sub>D<sub>2</sub> and 1,25(OH)<sub>2</sub>D<sub>3</sub>. The inter-assay CVs is 10.1% and 11.0% for each analyte, respectively. This methodology does not detect and does not have interference from paracalcitol or the C-3 epimeric forms of 25(OH)D<sub>3</sub> and 1,25(OH)<sub>2</sub>D<sub>3</sub>.

1. Phinney KW. Development of a standard reference material for vitamin D in serum. *Am J Clin Nutr.* 2008 Aug;88(2):511S-12S.

Supplementary Table 1. FGF23 values at baseline, 12, and 24 months by trajectory group

| FGF23, pg/mL | Group 1<br>Low stable<br>N = 162 | Group 2<br>Low increasing<br>N = 151 | Group 3<br>Elevated increasing<br>N = 268 | Group 4<br>Elevated decreasing<br>N = 110 | Group 5<br>Elevated stable<br>N = 228 | Total<br>N = 919     |
|--------------|----------------------------------|--------------------------------------|-------------------------------------------|-------------------------------------------|---------------------------------------|----------------------|
| Baseline     | 446<br>[221-898]                 | 602<br>[299-1636]                    | 2981<br>[1480-6634]                       | 3641<br>[2208-7332]                       | 18034<br>[8955-32860]                 | 2697<br>[735-9897]   |
| Month 12     | 270<br>[134-493]                 | 1212<br>[602-2208]                   | 5432<br>[3295-9897]                       | 1480<br>[812-2441]                        | 24343<br>[14765-36316]                | 3295<br>[812-13360]  |
| Month 24     | 365<br>[221-897]                 | 2697<br>[1636-6003]                  | 7332<br>[3641-14765]                      | 898<br>[446-1480]                         | 24343<br>[16318-36316]                | 4447<br>[1097-16318] |

Data are presents as median [IQR].

Supplementary Table 2. Odds ratios (95% CI) for variables significantly associated with FGF23 trajectories compared to the elevated stable trajectory

| Predictor                     | FGF23 Trajectory      |                       |                       |                       |                 |
|-------------------------------|-----------------------|-----------------------|-----------------------|-----------------------|-----------------|
|                               | Low Stable            | Low Increasing        | Elevated Increasing   | Elevated Decreasing   | Elevated Stable |
| Age                           | 1.06<br>(1.03 – 1.08) | 1.04<br>(1.02 – 1.06) | 1.01<br>(1.00 – 1.03) | 1.03<br>(1.01 – 1.05) | Reference       |
| Female                        | 0.34<br>(0.20 – 0.59) | 0.43<br>(0.26 – 0.73) | 0.79<br>(0.52 – 1.19) | 0.72<br>(0.42 – 1.24) | Reference       |
| Black                         | 1.23<br>(0.69 – 2.19) | 1.33<br>(0.75 – 2.34) | 0.96<br>(0.61 – 1.49) | 1.40<br>(0.78 – 2.52) | Reference       |
| Current smoking               | 1.12<br>(0.52 – 2.42) | 1.11<br>(0.57 – 2.19) | 1.25<br>(0.75 – 2.10) | 0.80<br>(0.37 – 1.72) | Reference       |
| Dialysis vintage              | 1.02<br>(0.96 – 1.09) | 1.01<br>(0.96 – 1.07) | 0.95<br>(0.91 – 1.00) | 1.02<br>(0.97 – 1.08) | Reference       |
| Diabetes                      | 2.58<br>(1.51 – 4.41) | 1.96<br>(1.18 – 3.28) | 1.32<br>(0.86 – 2.03) | 1.26<br>(0.74 – 2.16) | Reference       |
| Cardiovascular Disease        | 1.17<br>(0.65 – 2.11) | 1.12<br>(0.64 – 1.94) | 1.77<br>(1.11 – 2.82) | 0.96<br>(0.54 – 1.70) | Reference       |
| High Kt/V                     | 2.53<br>(1.54 – 4.17) | 1.33<br>(0.83 – 2.13) | 1.41<br>(0.96 – 2.07) | 1.54<br>(0.94 – 2.52) | Reference       |
| High Flux                     | 1.61<br>(0.99 – 2.63) | 1.43<br>(0.90 – 2.29) | 1.22<br>(0.83 – 1.79) | 2.64<br>(1.60 – 4.38) | Reference       |
| Catheter as vascular access   | 0.20<br>(0.07 – 0.56) | 0.43<br>(0.14 – 1.23) | 0.86<br>(0.34 – 2.19) | 0.33<br>(0.12 – 0.92) | Reference       |
| Residual kidney function      | 2.76<br>(1.59 – 4.77) | 2.05<br>(1.18 – 3.57) | 1.42<br>(0.86 – 2.36) | 1.64<br>(0.92 – 2.95) | Reference       |
| Markers of Mineral Metabolism |                       |                       |                       |                       |                 |
| Calcium                       | 0.31<br>(0.23 – 0.42) | 0.41<br>(0.53 – 0.83) | 0.66<br>(0.53 – 0.83) | 0.77<br>(0.58 – 1.02) | Reference       |
| Phosphorus                    | 0.44<br>(0.37 – 0.53) | 0.53<br>(0.45 – 0.62) | 0.75<br>(0.67 – 0.84) | 0.83<br>(0.72 – 0.95) | Reference       |
|                               |                       |                       |                       |                       | Reference       |

|                         |                       |                       |                       |                       |           |
|-------------------------|-----------------------|-----------------------|-----------------------|-----------------------|-----------|
| 25(OH)D                 | 0.87<br>(0.55 - 1.39) | 0.90<br>(0.58 - 1.40) | 0.94<br>(0.66 - 1.35) | 0.53<br>(0.33 - 0.84) |           |
| 1,25(OH) <sub>2</sub> D | 0.94<br>(.074 - 1.22) | 0.91<br>(0.72 - 1.15) | 0.85<br>(0.70 - 1.03) | 1.07<br>(0.84 - 1.37) | Reference |
| PTH                     | 1.00<br>(0.99 - 1.00) | 1.00<br>(0.99 - 1.00) | 1.00<br>(0.99 - 1.01) | 1.00<br>(0.99 - 1.00) | Reference |
| Vitamin D analog use    | 0.46<br>(0.27 - 0.77) | 0.62<br>(0.38 - 1.02) | 0.75<br>(0.50 - 1.13) | 0.65<br>(0.39 - 1.10) | Reference |
| Inflammatory Markers    |                       |                       |                       |                       |           |
| Albumin                 | 1.84<br>(0.83 - 4.10) | 1.42<br>(0.65 - 3.07) | 1.31<br>(0.70 - 2.46) | 1.83<br>(0.81 - 4.14) | Reference |
| CRP                     | 1.06<br>(0.84 - 1.32) | 1.04<br>(0.84 - 1.29) | 0.93<br>(0.78 - 1.11) | 0.98<br>(0.78 - 1.23) | Reference |
| IL-6                    | 0.71<br>(0.54 - 0.90) | 0.70<br>(0.53 - 0.90) | 0.85<br>(0.69 - 1.04) | 0.83<br>(0.63 - 1.10) | Reference |
| TNF- $\alpha$           | 1.04<br>(0.73 - 1.49) | 0.81<br>(0.59 - 1.12) | 1.10<br>(0.85 - 1.45) | 0.83<br>(0.59 - 1.17) | Reference |
| IFN- $\gamma$           | 0.66<br>(0.45 - 0.98) | 0.96<br>(0.67 - 1.41) | 1.05<br>(0.80 - 1.38) | 0.97<br>(0.67 - 1.41) | Reference |

Abbreviations: 25(OH)D, 25-hydroxyvitamin D; 1,25(OH)<sub>2</sub>D, 1,25-dihydroxyvitamin D; PTH, parathyroid hormone; FGF23, fibroblast growth factor 23; CRP, c-reactive protein; IL-6, interleukin-6, TNF- $\alpha$ , tumor necrosis factor-alpha; IFN- $\gamma$ , interferon-gamma.
